# Supplementary material
Source: publisher site journal article supplement (https://www.dovepress.com/get_supplementary_file.php?f=368128.docx)
Supplement: Supplementary file 1 [file get_supplementary_file.php]

**Table 1, supplement:** Your career choice >15 years after graduating from University.

| **Your career choice in the lung term**  don’t know (=1), declined (=2) – fully agree (=7) | **Don’t know** | **PBC** | **SBC** | **Male** | **Female** | **Undergrad.** | | **Graduate** |
| --- | --- | --- | --- | --- | --- | --- | --- | --- |
| Working in a private practice | 6.5% | 5.1+1.6 | 5.2+1.5 | 4.8+1.7 | 5.3+1.5 | 5.0+1.5 | | 5.3+1.5 |
| Group comparison | | p = 0.526 | | p < 0.01 | | p = 0.019 | | |
| Working in a hospital (non-academic) | 5.7% | 4.8+1.5 | 4.9+1.4 | 4.9+1.5 | 4.9+1.4 | 4.9+1.4 | | 4.8+1.5 |
| group comparison | | p = 0.544 | | p = 0.850 | | p = 0.968 | | |
| Would you like to become a Professor ? | 14.5% | 3.7+1.6 | 3.8+1.6 | 3.8+1.5 | 3.7+1.6 | 3.8+1.5 | 3.7+1.6 | |
| group comparison | | p = 0.478 | | p = 0.291 | | p = 0.642 | | |
| Academic career in a university hospital | 5.8% | 4.8+1.5 | 4.5+1.6 | 4.9+1.6 | 4.6+1.5 | 4.9+1.5 | | 4.4+1.6 |
| group comparison | | p = 0.027 | | p = 0.007 | | p < 0.001 | | |
| Patient-distant profession | 5.1% | 2.6+1.0 | 2.7+1.0 | 2.8+1.2 | 2.6+1.0 | 2.6+1.0 | | 2.7+1.1 |
| group comparison | | p = 0.461 | | p = 0.032 | | p = 0.056 | | |

**Table 2 supplement:**

Answers in the category job and spare time, differentiated acc. to curriculum, gender and study level.

| **Que****stions** | **Don’t know** (n=3) | **PBC**  (n=488) | **SBC**  (n=562) | **Male**  (n=271) | **Female**  (n=779) | **Undergrad.**  (n=436) | **Graduate**  (n=614) |
| --- | --- | --- | --- | --- | --- | --- | --- |
| Personal maturity, social contacts and fun are equally important. Don’t know (1), declined (2), fully agree (7) | 0.3% | 5.0+1.1 | 5.1+1.1 | 5.0+1.2 | 5.1+1.0 | 5.1+1.0 | 5.1+1.1 |
| group comparison | | p=0.222 | | p=0.163 | | p=0.423 | |
| **Questions** | | **PBC**  (n=490) | **SBC**  (n=563) | **Male**  (n=274) | **Female**  (n=779) | **Undergrad.**  (n=438) | **Graduate**  (n=615) |
| What’s more important for you, work-life-balance or fascination for the profession and career ? Work-life-balance (0), career (100) | | 39.3+24.7 | 34.5+22.8 | 41.5+26.3 | 35.0+22.6 | 39.8+23.5 | 34.5+23.8 |
| group comparison | | p=0.01 | | p=0.01 | | p<0.001 | |
| What would you weight more: Your living partner/family (0) or your career/job (100) ? | | 40.8+20.0 | 39.7+19.9 | 39.6+22.2 | 40.4+19.1 | 42.6+19.7 | 38.5+20.0 |
| group comparison | | p=0.193 | | p=0.243 | | p=0.001 | |

**Table 3 supplement:**

Preference of particular job characteristics.

| **How important is the following job specificity for you …**  don’t know (=1), declined (=2) – fully agree (=7) | **Don’t know** | **PBC** | **SBC** | **Male** | **Female** | **Undergrad.** | | **Graduate** |
| --- | --- | --- | --- | --- | --- | --- | --- | --- |
| High salary | 1.6% | 4.3+1.1 | 4.4+1.0 | 4.5+1.0 | 4.3+1.1 | 4.4+1.1 | | 4.4+1.1 |
| group comparison | | p = 0.879 | | p = 0.001 | | p = 0.20 | | |
| Defined working time | 1.8% | 4.4+1.3 | 4.6+1.3 | 4.3+1.4 | 4.6+1.3 | 4.3+1.2 | 4.7+1.2 | |
| group comparison | | p = 0.013 | | p = 0.048 | | p < 0.001 | | |
| Thankfulness | 1.4% | 4.6+1.2 | 4.6+1.2 | 4.5+1.2 | 4.7+1.2 | 4.6+1.2 | 4.7+1.2 | |
| group comparison | | p = 0.693 | | p = 0.035 | | p = 0.434 | | |
| Pleasure at work | 0.1% | 5.8+0.5 | 5.7+0.6 | 5.7+0.7 | 5.8+0.5 | 5.8+0.6 | 5.7+0.5 | |
| group comparison | | p = 0.085 | | p = 0.018 | | p = 0.279 | | |
| Professional license | 2.7% | 5.1+4 | 5.0+1.5 | 4.8+1.6 | 5.1+1.5 | 5.2+1.3 | 5.0+1.6 | |
| group comparison | | p = 0.930 | | p = 0.002 | | p = 0.139 | | |
| Personal responsibility | 0.3% | 4.9+1.0 | 4.7+1.1 | 5.0+1.0 | 4.7+1.0 | 4.9+1.0 | 4.7+1.0 | |
| group comparison | | P = 0.001 | | p = 0.001 | | p = 0.001 | | |
| Decision-making power | 0.7% | 4.8+1.1 | 4.7+1.1 | 5.0+1.0 | 4.6+1.1 | 4.8+1.1 | 4.7+1.1 | |
| group comparison | | p = 0.024 | | p < 0.001 | | p = 0.014 | | |
| Learning opportunities | 0.8% | 5.2+0.9 | 5.0+1.1 | 5.1+1.0 | 5.1+1.0 | 5.2+0.9 | 5.0+1.0 | |
| group comparison | | p = 0.013 | | p = 0.654 | | p = 0.001 | | |
| Job security | 0.3% | 5.3+0.9 | 5.4+0.9 | 5.2+1.0 | 5.4+0.9 | 5.3+0.9 | 5.3+1.7 | |
| group comparison | | p = 0.05 | | p = 0.024 | | p = 0.265 | | |
| Reputation | 6.8% | 4.0+1.6 | 4.0+1.8 | 4.0+1.6 | 4.0+1.8 | 4.2+1.8 | 3.9+1.7 | |
| group comparison | | p = 0.461 | | p = 0.815 | | p = 0.007 | | |
| Integration in a nice team | 0.3% | 5.7+0.6 | 5.7+0.7 | 5.5+0.8 | 5.7+0.6 | 5.6+0.6 | 6.7+0.6 | |
| group comparison | | p = 0.334 | | p < 0.001 | | p = 0.012 | | |
| Enough time for patient care | 0.1% | 5.4+0,8 | 5.4+0.8 | 5.2+1.0 | 5.5+0.8 | 5.4+0.8 | 5.4+0.8 | |
| group comparison | | p = 0.437 | | p < 0.001 | | p = 0.621 | | |
| Contact to humans | 1.2% | 5.2+1.0 | 5.0+1.2 | 4.9+1.2 | 5.2+1.1 | 5.1+1.1 | 5.1+1.1 | |
| group comparison | | p = 0.004 | | p < 0.001 | | p = 0.737 | | |
| Action at work | 8.8% | 3.6+1.4 | 3.4+1.5 | 3.7+1.4 | 3.5+1.5 | 3.8+1.4 | 3.4+1.4 | |
| group comparison | | p = 0.018 | | p = 0.005 | | p < 0.001 | | |

**Table 4 supplement:**

Perceptions towards medical studies as a preparation to become a good doctor.

| **Perceptions towards medical studies**  don’t know (=1), declined (=2) – fully agree (=7) | **Don’t know** | **PBC** | **SBC** | **Male** | **Female** | **Undergrad.** | | **Graduate** |
| --- | --- | --- | --- | --- | --- | --- | --- | --- |
| I enjoy the flexibility of my studies | 11.1% | 4.0+1.7 | 3.9+1.5 | 4.2+1.7 | 3.8+1.6 | 4.0+1.8 | | 3.8+1.4 |
| group comparison | | p = 0.316 | | p = 0.001 | | p = 0.533 | | |
| The medical study should be clinically focused | 0.3 | 5.5+0.8 | 5.5+0.8 | 5.4+0.8 | 5.5+0.8 | 5.4+0.8 | 5.5+0.8 | |
| group comparison | | P = 0.973 | | p = 0.430 | | p < 0.001 | | |
| Personal maturity, socialization and fun is as important as medical training | 0.3% | 5.0+1.1 | 5.1+1.0 | 5.0+1.2 | 5.1+1.0 | 5.1+0.8 | 5.0+1.1 | |
| group comparison | | p = 0.306 | | p = 0.136 | | p = 0.333 | | |
| PBC is more clinical relevant than SBC | 3.0% | 5.3+1.3 | 5.9+1.6 | 5.6+1.4 | 5.6+1.5 | 5.6+1.3 | 5.7+1.6 | |
| group comparison | | p < 0.001 | | p = 0.397 | | p = 0.026 | | |

**Figure 1, supplement:** Quotation tree which was developed during the transcription of the interviews

Study related statements

Anticipation

Study content

Knowledge transfer and learning pattern

Self management

Expectations and awareness

Expectations and aims

Desire to go deeper in learning material / content suggestions

Career preparation

Challenging and ambition

Competitiveness

Career options

Hospital career vs. private practice

Undecided and a career in patient distant professions

Academic career / Doctoral thesis

Working / studying abroad

Why medicine ?

Social competence

Scientific interest

Other reasoning

Study

Students‘ choice

Career plans

Work-life-balance

Awareness and expectations

Weighting work-life-balance

Solutions to improve work-life-balance

No interest, not decided

Reasons for going abroad during training or thereafter

Indecisiveness

Categorization

Socialization
